# Supplementary material for: Perfluorooctane sulfonate exerts inflammatory bowel disease-like intestinal injury in rats
Source: PeerJ. 2021 Jan 8;9:e10644. doi: 10.7717/peerj.10644 (PMC7798615; doi:10.7717/peerj.10644)
Supplement: Supplemental Information 2 [file peerj-09-10644-s002.xlsx]

## Sheet: Sheet1
Figure 1A
Body weight (g)-before 15 days			Body weight (g)-After 15 days
PFOS（mg/kg）			PFOS（mg/kg）
0	1	10	0	1	10
218.5	219.4	223.2	321.4	324.2	318.4
222.3	218.3	222.3	330.2	331.5	305.7
220.4	220.6	220.3	325.3	326.3	318.9
219.5	223.7	217.9	330.4	320.1	319.7
221.5	219.8	218.5	329.6	326.7	313.3
Figure 1B			Figure 1C
SAA (ng/ml)			hs-CRP(ng/ml)
PFOS（mg/kg）			PFOS（mg/kg）
0	1	10	0	1	10
0.31	0.34	0.62	6.88	7.45	7.64
0.35	0.38	0.48	7.01	6.97	7.72
0.29	0.42	0.55	6.93	7.15	7.81
0.37	0.37	0.64	7.33	7.19	7.66
0.35	0.39	0.49	7.14	7.32	7.79
Figure 2J
Villi height (μm)-duodenum			Villi height (μm)-jejunum
PFOS（mg/kg）			PFOS（mg/kg）
0	1	10	0	1	10
387	367	314	408	387	331
413	372	322	411	383	326
402	359	309	419	376	325
405	385	326	422	379	323
398	374	317	429	398	319
Figure 2K
Crypt depth (μm)
PFOS（mg/kg）
0	1	10
158	151	133
163	153	131
152	148	127
161	147	125
163	152	138
Figure 2L			Figure 2M
Duodenum Total score (A.U.)			Jejunum Total score (A.U.)
PFOS（mg/kg）			PFOS（mg/kg）
0	1	10	0	1	10
1	3.5	6.5	1.5	3	5.5
1.5	2	7	2	2.5	5
2.5	2.5	6	2.5	4.5	6
2	4	6	2	4	6
1	4	6.5	1.5	3.5	6.5
Figure 3J
Tunel positive cells
PFOS（mg/kg）
0	1	10
6	27	48
8	21	56
5	22	45
12	29	55
15	23	57
Figure 4G			Figure 4H
F4/80 positive cells			Ly6g positive cells
PFOS（mg/kg）			PFOS（mg/kg）
0	1	10	0	1	10
2	13	35	0	3	45
0	7	28	2	1	22
3	9	41	0	2	13
1	15	33	3	0	18
5	7	36	1	1	21
Figure 5G			Figure 5H
TNF-α positive cells			IL-6 positive cells
PFOS（mg/kg）			PFOS（mg/kg）
0	1	10	0	1	10
7	12	45	1	12	18
4	16	39	2	18	19
2	11	51	1	9	31
5	19	40	3	16	34
9	22	47	0	15	27
Figure S1A
hs-CRP(ng/ml)
PFOS（mg/kg）-15 days			PFOS（mg/kg）-28 days
0	1	10	0	1	10
6.58	7.33	7.83	6.69	7.51	7.73
7.21	6.96	7.69	7.11	7.02	7.81
7.12	7.21	7.77	6.67	7.23	7.83
6.69	7.16	7.58	7.23	7.25	7.69
7.16	7.47	7.75	7.17	7.39	7.86
Figure S1B
SAA (ng/ml)
PFOS（mg/kg）-15 days			PFOS（mg/kg）-28 days
0	1	10	0	1	10
0.33	0.35	0.59	0.33	0.35	0.65
0.27	0.41	0.58	0.34	0.37	0.58
0.36	0.34	0.45	0.27	0.43	0.64
0.32	0.37	0.62	0.39	0.42	0.67
0.28	0.36	0.53	0.32	0.38	0.57
Figure S1I
Villi height (μm)-duodenum			Villi height (μm)-jejunum
PFOS（mg/kg）			PFOS（mg/kg）
0	1	10	0	1	10
376	365	304	418	375	311
402	352	313	402	367	321
409	369	299	413	376	309
411	377	315	418	372	331
394	361	321	432	384	303
Figure S1J
Total score (A.U.)-duodenum			Total score (A.U.)-jejunum
PFOS（mg/kg）			PFOS（mg/kg）
0	1	10	0	1	10
1.5	3	7	1	3.5	6
1	3.5	7.5	1.5	3	6.5
1	3.5	7.5	2	4	6
2	4	7	2.5	4.5	6.5
1.5	4	6.5	1.5	3.5	7
